# Supplementary material
Source: publisher figshare collection journal article supplement (https://gsapubs.figshare.com/ndownloader/files/25657031)
Supplement: Supplementary file 1 [file 25657031]

Table S2. Multi-zircon aliquot U-Pb analyses determined by isotope dilution thermal ionization mass spectrometry at University of Kansas Isotope Geochemistry Laboratory. Analyzed May, 1991. Isotopic ratios are corrected for blank and common Pb from 204Pb and Stacey and Kramers (1975) Pb evolution model. Assumed 238U/235U= 137.82 (Hiess et al., 2012).

| **Sample aliquot** | **U ppm** | **206Pb/238U** | **±1σ (%)** | **207Pb/206Pb** | **±1σ (%)** | **207Pb/235U** | **±1σ (%)** | **Rho** | **206Pb/238U date (Ma)** | **±1σ (Ma)** |
| --- | --- | --- | --- | --- | --- | --- | --- | --- | --- | --- |
| *South Merrimac* |  |  |  |  |  |  |  |  |  |  |
| 151S-1 | 863 | 0.0207799 | 0.476 | 0.048775 | 0.112 | 0.1397 | 0.489 | 0.97 | 132.6 | 0.6 |
| 151S-2 | 944 | 0.0209001 | 0.518 | 0.0481443 | 0.155 | 0.1387 | 0.541 | 0.96 | 133.3 | 0.7 |
| 151S-3 | 2137 | 0.0210257 | 0.482 | 0.0488731 | 0.0545 | 0.1416 | 0.485 | 0.99 | 134.1 | 0.6 |
|  |  |  |  |  |  |  |  |  |  |  |
| *North Merrimac* |  |  |  |  |  |  |  |  |  |  |
| 235N-1 | 281 | 0.0217989 | 0.534 | 0.0488039 | 0.155 | 0.1466 | 0.556 | 0.96 | 139.0 | 0.7 |
| 235N-2 | 134 | 0.0220643 | 0.468 | 0.0488198 | 0.144 | 0.1485 | 0.490 | 0.96 | 140.7 | 0.7 |
| 235N-3 | 278 | 0.0211874 | 0.536 | 0.0487506 | 0.693 | 0.1424 | 0.876 | 0.61 | 135.2 | 0.7 |
|  |  |  |  |  |  |  |  |  |  |  |

REFERENCES:

Hiess, J., Condon, D.J., McLean, N., and Noble, S.R., 2012, 238U/235U systematics in terrestrial uranium-bearing minerals: Science, v. 335, p. 1610-1614.

Stacey, J.S., and Kramers, J.D., 1975, Approximation of terrestrial lead isotope evolution by a two-stage model: Earth and Planetary Science Letters, v. 26, p. 207-221.


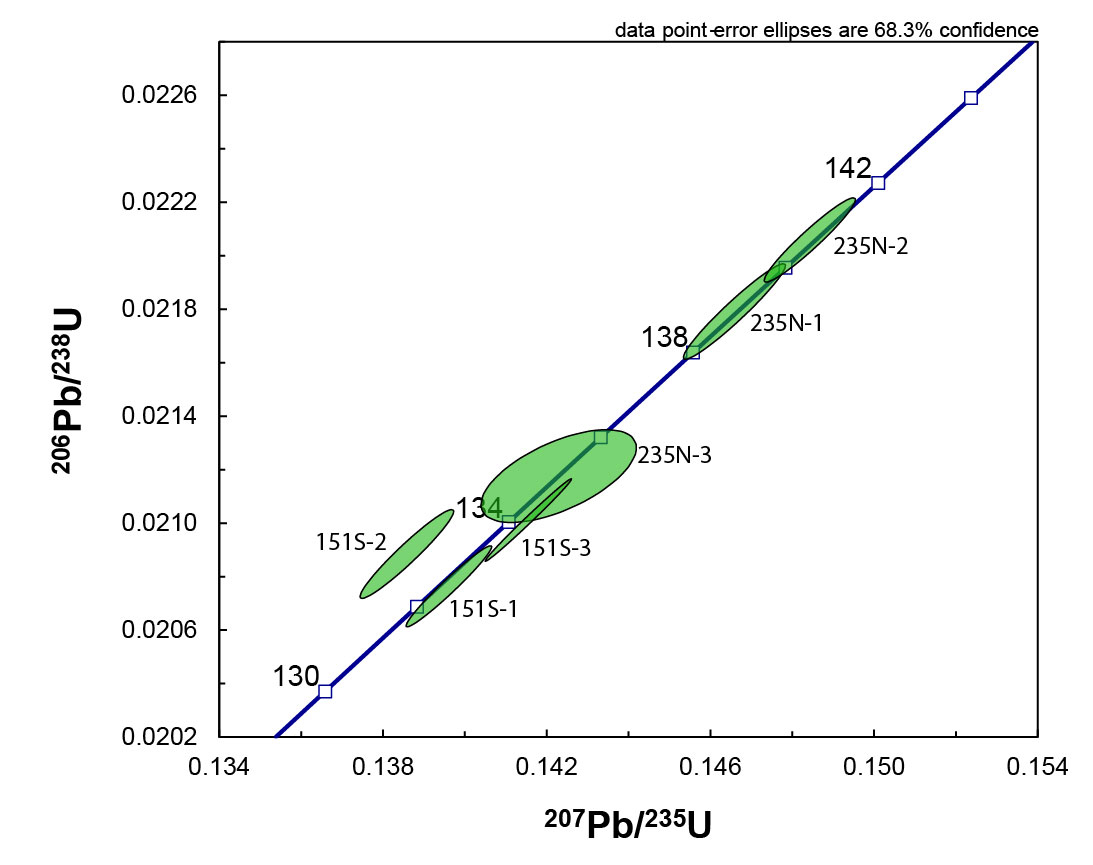


Figure S1. Concordia plot of data in Table S2.
